# Supplementary material for: Bioactivities of Traditional Medicinal Plants in Alexandria
Source: Hindawi journal article supplement (doi:10.1155/2018/1463579), 2018-01-01
Supplement: f1 [file 1463579.f1.pdf]

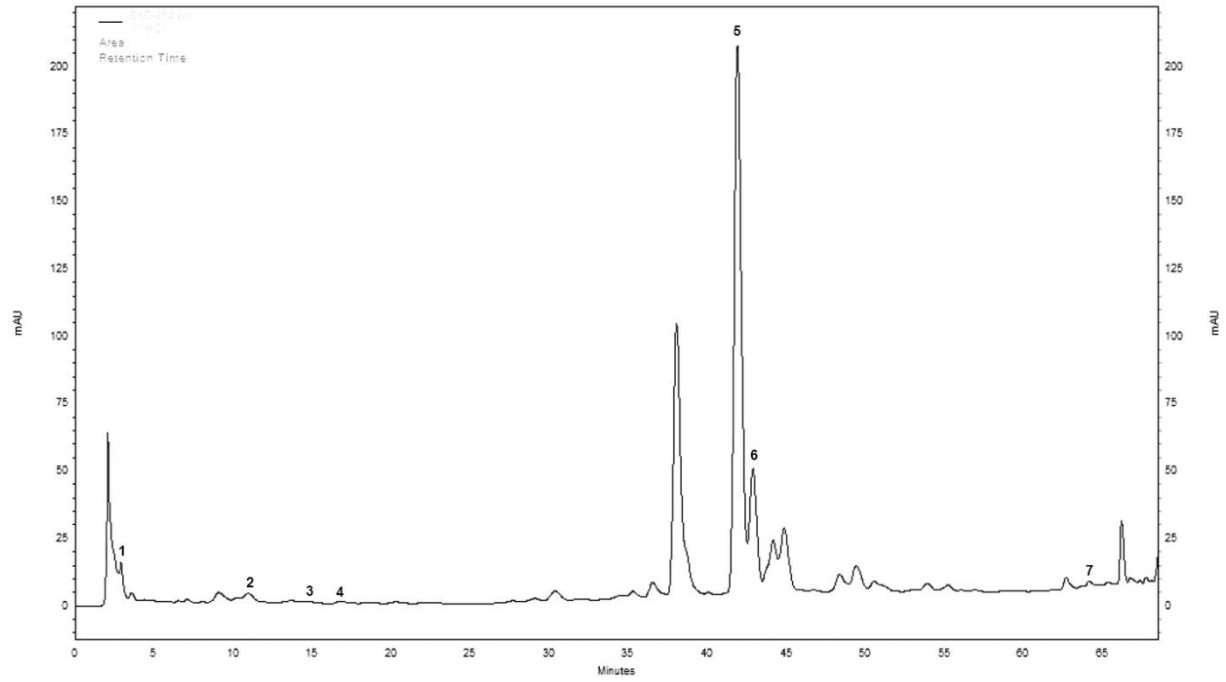

Supplementary Figure 1. The HPLC-UV chromatogram of methanolic extract from *Asparagus aethiopicus* leaf: 1 – gallic acid, 2 – chlorogenic acid, 3 – vanillic acid, 4 – caffeic acid, 5 – robinin, 6 – rutin, 7 – apigein.

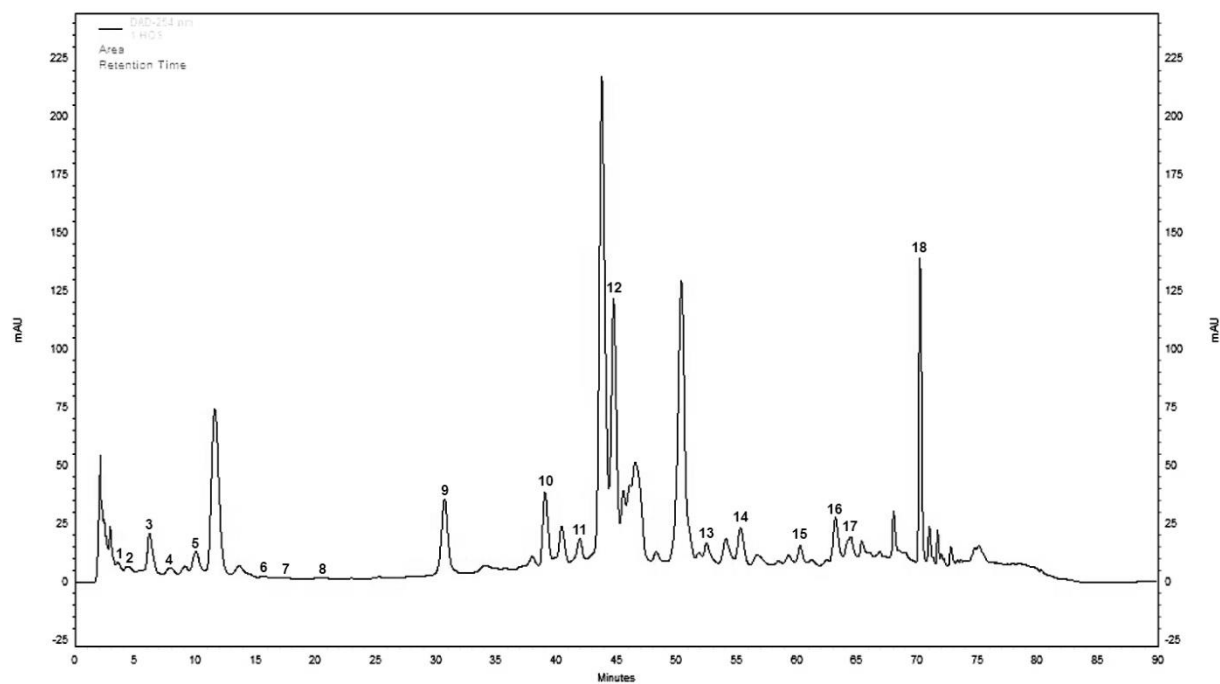

Supplementary Figure 2. The HPLC-UV chromatogram of methanolic extract from *Senna alexandriana* fruit: 1 – gallic acid, 2 – neochlorogenic acid, 3 – protocatechuic acid, 4 – epigallocatechin, 5 - gentisic acid, 6 - vanillic acid, 7 - caffeic acid, 8 - syringic acid, 9 - 6-hydroxy-4-methylcoumarin, 10 - benzoic acid, 11 – cynaroside, 12 – isoquercetin, 13 – psoralene, 14 – quercetin, 15 – luteolin, 16 – kaempferol, 17 – isoramnetin, 18 – rhamnetin.
